# Supplementary material for: Trans-differentiation of Jdp2-depleted Gaba-receptor-positive cerebellar granule cells to Purkinje cells
Source: PubMed Central journal article supplement (PMC11655981; doi:10.1038/s41420-024-02262-2), 2024-12-18
Supplement: 41420_2024_2262_MOESM1_ESM.pdf [file 41420_2024_2262_MOESM1_ESM.pdf]

## Supplementary materials

### **Trans-differentiation of Jdp2-depleted Gaba-receptor-positive cerebellar granule cells to Purkinje cells**

Chia-Chen Ku<sup>1-3</sup>, Jia-Bin Pan<sup>1-3</sup>, Kenly Wuputra<sup>1-3</sup>, Wen-Li Hsu<sup>2,4,14</sup>, Kohsuke Kato<sup>5</sup>, Michiya Noguchi<sup>6</sup>, Yukio Nakamura<sup>6</sup>, Shigeo Saito<sup>7</sup>, Cheng-Yu Tsai<sup>1,8-10</sup>, Ying-Chu Lin<sup>11</sup>, Deng-Chyang Wu<sup>2,12\*</sup>, Chang-Shen Lin<sup>1,13</sup>, and Kazunari K. Yokoyama<sup>1-3\*</sup>

<sup>1</sup>Graduate Institute of Medicine, Kaohsiung Medical University, Kaohsiung 80708, Taiwan,

<sup>2</sup>Regenerative Medicine and Cell Therapy Research Center, Kaohsiung Medical University, Kaohsiung 80708, Taiwan.

<sup>3</sup>Cell Therapy and Research Center, Kaohsiung Medical University Hospital, Kaohsiung 80756, Taiwan.

<sup>4</sup>Department of Dermatology, Kaohsiung Municipal Ta-Tung Hospital, Kaohsiung Medical University Hospital, Kaohsiung Medical University, Kaohsiung 80145, Taiwan.

<sup>5</sup>Department of Infection Biology, Graduate School of Comprehensive Human Sciences, the University of Tsukuba, Tsukuba 305-8577, Japan.

<sup>6</sup>Cell Engineering Division, RIKEN BioResource Research Center, Tsukuba. Ibaraki 305-0074, Japan.

<sup>7</sup>Saito Laboratory of Cell Technology, Yaita 329-1571, Tochigi, Japan.

<sup>8</sup>Division of Neurosurgery, Department of Surgery, Kaohsiung Medical University Hospital, Kaohsiung 80756, Taiwan.

<sup>9</sup>Division of Neurosurgery, Department of Surgery, Kaohsiung Medical University Gangshan Hospital, Kaohsiung 820, Taiwan.

<sup>10</sup>Department of Post-Baccalaureate Medicine, Kaohsiung Medical University, Kaohsiung 80708, Taiwan.

<sup>11</sup>School of Dentistry, Kaohsiung Medical University, Kaohsiung 80708, Taiwan,

<sup>12</sup>Division of Gastroenterology, Department of Internal Medicine, Kaohsiung Medical University Hospital, Kaohsiung 820, Taiwan.

<sup>13</sup>Department of Biological Sciences, National Sun Yat-sen University, Kaohsiung 80424, Taiwan.

<sup>14</sup>Present address: National Center for Geriatrics and Welfare Research, National Health Research Institutes, Yunlin County 632007, Taiwan.

\*To whom correspondence may be addressed; Kazunari K. Yokoyama (kazu@kmu.edu.tw; Cell Therapy and Research Center, Kaohsiung Medical University Hospital; Graduate Institute of Medicine, Kaohsiung Medical University, Taiwan, Tel; +886-7312. 1001, ext 2729; FAX; +886-7313-3849), and Deng-Chyang Wu (dechwu@kmu.edu.tw; Division of Gastroenterology, Department of Internal Medicine, Kaohsiung Medical University Hospital, Taiwan). ORCID of KK. Yokoyama; 0000-0001-8508-7587; CS Lin; 0000-0001-7415-2187; K. Wuputra; 0000-0003-4026-7052; WL Hsu; 0000-0003-1034-4977; YC Lin; 0000-0002-2499-8632, and CC Ku; 0000-0002-1496-3081.

## **Supplementary Materials**

- 1. Materials and Methods**
- 2. Supplementary legends of Figures 1-5**
- 3. Supplementary Tables 1-2**

## **MATERIALS AND METHODS**

### **Animals and cells**

The animal welfare guidelines for the care and use of laboratory animals used here were those published by the RIKEN BioResource Research Center (BRC) in Japan ([Kitesv.intra.riken.jp/JoureiV5HTMLContents/act/print/print110000514.htm](http://kitesv.intra.riken.jp/JoureiV5HTMLContents/act/print/print110000514.htm)), the Animal Care Committee of the National Laboratory Animal Center (NLAC) (106022), and Kaohsiung Medical University in Taiwan (106189; 107128; 108244). All animal experiments were performed in accordance with these approved guidelines. The strategy used to generate the *Jdp2* KO mouse model was described previously [1–5].

### **Primary culture of GCPs**

The preparation of GCPs from newborn mice (postnatal days 5–7) was carried out as described previously [1, 2, 6, 7]. In brief, the meninges and skull were excluded, and the cerebellum was stored in cold Hanks–glucose buffer (Thermo Fisher Scientific, Waltham, MA, USA). To digest the single cells from cerebellar tissues, we used Earle’s balanced salt solution containing papain (20 U/ml; Worthington, Lakewood, NJ, USA), 1 mM L-cysteine, 0.5 mM ethylene diamine tetra-acetic acid, and 0.05% DNase1 at 37 °C for 15 min [1, 2]. The tissues were pipetted repeatedly to obtain a suspension of single cells, followed by centrifugation at  $200 \times g$  for 5 min. After discontinuous density gradient centrifugation, the cell pellets were resuspended in 3 ml of EBSS, and then 5 ml of EBSS containing 0.2% ovomucoid and a 0.1% bovine serum albumin (BSA) inhibitor solution were then added carefully onto the upper layer, followed by centrifugation at  $70 \times g$  for 6 min [8]. The dishes and plates were pre-coated in 50  $\mu\text{g/ml}$  poly-D-lysine (BD

Biosciences, San Jose, CA, USA) using the following culture medium: neurobasal A medium, 2% B-27 supplement, 100 U/ml penicillin, 100 µg/ml streptomycin, 2 mM glutamine, 5 µg/ml insulin, 100 µg/ml apo transferrin, and 16 µg/ml putrescine (all from Thermo Fisher Scientific, Waltham, MA, USA); plus 1 mM sodium pyruvate, 100 µg/ml BSA, 30 µM N-acetyl cysteine, 62 ng/ml progesterone, 40 ng/ml sodium selenite, and 5 ng/ml epidermal growth factor (all from Merck KGaA, Darmstadt, Germany).

### **Fluorescence-activated cell sorting (FACS) of GCPs using anti-Gabra6 antibodies**

FACS using GCPs was carried out to separate the subpopulation based on Gabra6-FITC labeling. The GCPs were washed with 10 mM Dulbecco's modified phosphate basal saline (PBS) and detached using trypsin (Thermo Fisher Scientific) in the presence of DNase (Merck). Trypsinization was stopped using 10% fetal bovine serum and the cells were washed with PBS containing 0.5% BSA. Subsequently, the cells were centrifuged at 1,000 rpm for 5 min at 4 °C and resuspended in 300 µl of PBS containing 0.5% BSA. The GCPs were cultivated in the presence of 30 µM NAC for 7 days to commit the neural differentiation. Then, the cells were labeled with Gabra6-FITC antibodies (1:100; Bioss, Woburn, MA, USA, bs-12063R-FITC), which were added to labeled GCPs, followed by a 30-min incubation. Finally, GCPs labeled with Gabra6-FITC antibodies were washed by PBS containing 0.5% BSA, and the samples were then analyzed on a BD FACSMelody™ Cell Sorter (BD Biosciences, New Jersey, USA), to sort each subpopulation. The data were plotted and quantified using FlowJo (v. 10; BD Biosciences). The sorted Gabra6-positive GCPs (Gabra6<sup>+</sup> GCPs) and Gabra6-negative GCPs (Gabra6<sup>-</sup> GCPs) were cultured as described above.

**Incorporation of bromodeoxyuridine (BrdU)**

BrdU Cell Proliferation Assay Kits (Cell Signaling Technology, Beverly, MA, USA) were used to detect the sorted GCPs, according to the manufacturer's instructions. For immunocytochemistry of the stained cells, fixed GCs stained with the anti-BrdU antibody were developed using streptavidin–HRP plus ChemMate™ DAKO EnVision™ Detection kits (Dako, Glostrup, Denmark; K5007). The cells were visualized using an Olympus CKX41 microscope (Olympus, Tokyo, Japan), and the resulting images were quantified using the open access Fiji/ImageJ analytical software (<https://imagej.net/Fiji>) [9].

**Immunocytochemistry**

GCPs or Gabra6<sup>+</sup> GCPs/Gabra6<sup>-</sup> GCPs were subjected to immunocytochemistry before or after cultivation as described elsewhere [1, 2]. The primary and secondary antibodies were shown in Supplemental Table 1. Cells were mounted on slides using the ProLong® Gold antifade mounting medium (Molecular Probes, Thermo Fisher Scientific; P36934), and cell immunofluorescence was visualized using a FV1000 confocal laser scanning microscope (Olympus, Tokyo, Japan), and the resulting images were quantitated using the open access Fiji/ImageJ analytical software (<https://imagej.net/Fiji>) [9].

**Differentiation of Gabra6<sup>+</sup>-GCPs into PCs**

**Method A; Formation of sphere bodies via GCP aggregation;** The FACS sorted GCPs by anti-Gabra6 antibodies were cultivated in the presence of NAC to aggregate neurosphere bodies in low-attachment 96-well plates. The culture conditions were the same as those described above for the GC primary culture, with addition of the mouse leukemia inhibitory factor (mLIF; Millipore, Darmstadt, Germany) and 2-

mercaptoethanol (2-Me; Merck, 10 nM).

**Method B; Two dimension (2D) flat cell culture after digesting by accutase;** The sphere bodies of Gabra6<sup>+</sup>-GCPs were cultivated for 7 days in the presence of NAC and then these developing sphere bodies were digested by Accutase (Merk, SCR 005) as described in the manufacturer's protocols. The differentiation medium was consisted of the growth-factor-free chemically defined medium (gfCDM) [10] containing insulin [11] termed ESF5 medium [2], was used as a differentiation condition medium and included insulin (10 µg/ml), transferrin (5 µg/ml), 2-aminoethanol (10 µM), 2-mercaptoethanol (10 µM), and sodium selenite (20 nM) (all from Merck). Several recombinant proteins, i.e., FAF-BSA (100 µg/ml; Merck, A8806-5G), the brain-derived neural factor (BDNF) (50 ng/ml; ProSpec, Ness-Ziona, Israel, cyt-688-b), NT3 (50 ng/ml; ProSpec, cyt-919-b), T3 (10 ng/ml; Sigma-Aldrich, Merk, T5516-1MG)[50], FGF2 (10 ng/ml; R&D Systems Inc., Minneapolis, MN) [2], and heparin (100 ng/ml; Merck, H3149-10KU), were also used for the induction of differentiation.

### **Western blotting**

Western blotting experiments were performed as described previously [1, 2]. The PVDF membranes were then probed with primary antibodies against CACNα1A (1:1000; MyBioSource, mbs176970), calbindin (1:1000; Cell Signaling Technology, 13176), GABRα1 (1:1000; R&D, PPS022), GABRα6 (1:1000; Bioss, BS12063R), GABRβ2 (1:1000; R&D, PPS031), GRIN2A (1:1000; R&D; PPS012), PCP4 (1:1000; MyBioSource, mbs2517367), and VGLUT1 (1:1000; Cell Signaling Technology, 12331); followed by incubation with the secondary antibodies: anti-rabbit IgG HRP-conjugated antibody (1:3000; Cell Signaling Technology, 7074) and anti-mouse IgG HRP-conjugated

antibody (1:3000; Cell Signaling Technology, 7076). The results were analyzed using a ChemiDoc XRSPlus instrument (Bio-Rad, Hercules, CA, USA).

### **Immunocytochemistry**

GCPs or Gabra6<sup>+</sup> GCPs/Gabra6<sup>-</sup> GCPs were subjected to immunocytochemistry before or after cultivation as described elsewhere [1, 2]. The primary antibodies were against Atoh1 (1:200; Chemicon, AB5692), Neph3 (1:200; MyBioSource, mbs153480), calbindin (1:200; Cell Signaling Technology, 13176), Gabra6 (1:200; Bioss, BS12063R), P/Q-type (1:200; Santa Cruz, sc-390004), and  $\beta$ 3-tubulin (1:200; Cell Signaling Technology, 4466). After washing with PBST, the cells were incubated for 1.5 h with the following secondary antibodies: Alexa Fluor® 594-conjugated goat anti-rabbit IgG (Life Technologies, Grand Island, NY, USA; A11037), Alexa Fluor® 594-conjugated goat anti-mouse IgG (Life Technologies; A11032), and Alexa Fluor® 488-conjugated goat anti-rabbit IgG (Life Technologies; A11034); then processed using 4',6-diamino-2-phenylindole (DAPI), to visualize cell nuclei (1:3000; Merck). Cells were mounted on slides using the ProLong® Gold antifade mounting medium (Molecular Probes, Thermo Fisher Scientific; P36934), and cell immunofluorescence was visualized using a FV1000 confocal laser scanning microscope (Olympus, Tokyo, Japan).

### **Formation of neurosphere bodies via GCP aggregation**

In the case of differentiation, primary culture of sorted GCPs was performed to aggregate neurosphere bodies in low-attachment 96-well plates. The culture conditions were the same as those described above for the GC primary culture, with addition of the mouse leukemia inhibitory factor (mLIF; Millipore-Merck) and 2-mercaptoethanol (10 nM,

Merck, W7522), to maintain the stemness of GCPs and inhibit cell differentiation.

### **RNA sequencing, gene clustering, and gene categorization**

RNA sequencing was conducted using a Genome Analyzer IIX System (Illumina, San Diego, CA, USA) according to the 50-bp single-end protocol by Welgene Biotech (Taipei, Taiwan), as described previously [1, 2]. The sequences obtained were subjected to a filtering process using ConDeTri [13], to obtain qualified reads, which were investigated and estimated by TopHat/Cuffdiff [14]. The Human Genome Build 19 and gene features were retrieved from the Ensemble database and used for processing. The gene expression levels were calculated as reads/kilobase of transcript/million mapped reads (RPKM). Differentially expressed genes were filtered using an RPKM  $\geq 0.3$ , a fold change  $\geq 2$ , and a  $P$  value  $< 0.05$ . RNA sequencing data were deposited in the NCBI Bioproject Database (<http://www.ncbi.nlm.nih.gov/bioproject>) with the accession numbers SUB3541857, SUB3541902, SUB3541913, and SUB3541945.

Hierarchical clustering of the genes was performed as follows. First, gene-level normalization was performed by transforming the RPKM of each gene of each sample to a Log<sub>2</sub> median-centered ratio. Subsequently, clustering was obtained using Euclidean distance and complete linkage settings. Finally, a heatmap was generated by coloring each gene on the Log<sub>2</sub> median-centered ratio. To convert gene symbols to Ensemble gene accessions, the unique gene symbols of each topic were mapped to Ensemble official symbols.

### **Cancer genome atlas/cBioPortal analysis**

Large-scale cancer genomics projects such as The Cancer Genome Atlas [15] are



generating an overwhelming amount of cancer genome data from different technical platforms. The cBioPortal for Cancer Genomics (<http://cbioportal.org>) provides a Web resource for exploring, visualizing, and analyzing multidimensional cancer genomics data. The portal reduces molecular profiling data from cancer tissues and cell lines into readily understandable genetic, epigenetic, gene expression, and proteomic events [16, 17]. This accelerates the translation of genomics data into the identification of cascades, therapies, and clinical trials. The cBioPortal (<http://www.cbioportal.org/faq#how-do-i-cite-the-cbioportal>) data were accessed (Sept. 21<sup>st</sup>, 2022), and we surveyed gene mutation maps of GABA receptors, xCT channels, GSH, antioxidation response-related proteins. Finally, 8,139 patients and 8,597 samples from 26 studies were summarized in the cBioPortal for Cancer Genomics [16, 17] in brain tumors.

### **Statistical analysis**

Data are presented as the mean  $\pm$  standard error of the mean. Statistical comparisons between experimental conditions were conducted using GraphPad Prism 5.0 (GraphPad Software, San Diego, CA, USA). For multiple comparisons, a one-way analysis of variance (ANOVA) followed by Tukey's test were performed using GraphPad Prism 7.0 (GraphPad, San Diego, CA, USA). An unpaired, two-tailed Student's *t*-test was used to compare the control and treatment groups. The Mann–Whitney nonparametric median statistical test was used for analyses of cell areas. All differences were designated as being statistically significant at  $P < 0.05$ .

### **References**

1. Ku CC, Wuputra K, Kato K, Pan JB, Li CP, Tsai MH, et al. Deletion of Jdp2 enhances Slc7a11 expression in Atoh-1 positive cerebellum granule cell progenitors in vivo. *Stem Cell Res Ther* 2021; 12: 369.
2. Ku CC, Wuputra K, Kato K, Lin WH, Pan JB, Tsai SC, et al. Jdp2-deficient granule cell progenitors in the cerebellum are resistant to ROS-mediated apoptosis through xCT/Slc7a11 activation. *Sci Rep* 2020; 10: 4933.
3. Pan J, Nakade K, Huang YC, Zhu ZW, Masuzaki S, Hasegawa H, et al. Suppression of cell-cycle progression by Jun dimerization protein-2 (JDP2) involves downregulation of cyclin-A2. *Oncogene* 2010, 29: 6245-6256.
4. Nakade K, Pan J, Yoshiki A, Ugai H, Kimura M, Liu B, et al. JDP2 suppresses adipocyte differentiation by regulating histone acetylation. *Cell Death Differ* 2007, 14: 1398-1405.
5. Tanigawa S, Lee CH, Lin CS, Ku CC, Hasegawa H, Qin S, et al. Jun dimerization protein 2 is a critical component of the Nrf2/MafK complex regulating the response to ROS homeostasis. *Cell Death & Disease* 2013, 4: e921-e921.
6. Lee HY, Greene LA, Maspn CA, Manzini MC. Isolation and culture of post-natal mouse cerebellar neuron progenitor cells and neurons. *J Vis Exp* 2009, 12: 990.
7. Malach R. Cerebellar Column as devices for maximizing neural diversity. *Trends Neurosci* 1994, 17: 101-104.
8. Kawaguchi K, Habara T, Terashima T, Kikkawa S. GABA modulates development of cerebellar Purkinje cell dendrites under control of endocannabinoid signaling. *J Neurochem*. 2010, 114:627-638.
9. Rueden CT, Scindelin J, Hiner MC, DeZonia BE, Waite AE, Arena ET, et al. ImageJ2: Image J for the next generation of scientific image data. *BMC Bioinformatics* 2017, 18: 529.
10. Wataya T, Ando S, Muguruma K, Ikeda H, Watanabe K, Eiraku M, et al. Ninivization of exogenous signals in ES culture induces rostral hypothalamic differentiation. *Proc Natl Acad Sci USA* 2008, 105: 11796-11801.
11. Yamasaki S, Nabeshima K, Sotomaru Y, Taguchi Y, Mukasa H, Furue MK, et al. Long-term serial cultivation of mouse induced pluripotent stem cells in serum-free and feeder-free defined medium. *The International journal of developmental biology* 2013, 57: 715-724.
12. Hatsukano T, Kurisu J, Fukumitsu K, Fujishima K, Kengaku M. Thyroid Hormone Induces PGC-1 $\alpha$  during Dendritic Outgrowth in Mouse Cerebellar Purkinje Cells. *Front Cell Neurosci* 2017, 11: 133 (2017).
13. Smeds L, Küntner A. ConDeTri--a content dependent read trimmer for Illumina data. *Plos one* 2011, 6: e26314.
14. Trapnell C, Roberts A, Goff L, Pertea G, Kim D, Kelley DR, et al. Differential gene and transcript expression analysis of RNA-seq experiments with TopHat and Cufflinks. *Nature protocols* 2012, 7: 562-578.
15. Ciriello G, Miller ML, Aksoy BA, Senbabaoglu Y, Schultz N, Sander C. Emerging landscape of oncogenic signatures across human cancers. *Nature Genet*, 2013, 45: 1127-1130.

16. Cerami E, Gao J, Dogrusoz U, Gross BE, Sumer SO, Aksoy BA, et al. The cBio cancer genomics portal: an open platform for exploring multidimensional cancer genomics data. *Cancer Discovery* 2012, 2: 401-404.
17. Gao J, Aksoy BA, Dogrusoz U, Dresdner G, Gross B, Sumer SO, et al. Integrative analysis of complex cancer genomics and clinical profiles using the cBioPortal. *Sci Signal*. 2013, 6: p11.

### Supplementary Figure legends

**Fig. S1.** Expression ratio of cerebellar cell types between WT and *Jdp2* KO GCPs. **(A)** The GCPs were assigned based on the expression of *Atoh-1*, *Zic1*, *Pax6*, *NeuroD1*, and *Lhx9*. Purkinje cells were estimated based on the expression of *calbindin 1* and *2*, *Doc2b*, and *Pcp4*. Bergmann glial cells were estimated based on the expression of *Sept4* and *Cdf10*. Basket cells are represented by the expression of *Cck*, stellate cells by *Gria2*, astrocytes by *Cd44*, and oligodendrocytes by *Oligo2*. These expression frequencies were calculated as the total RNA expression and then summarized as a percentage of the relative RNA expression profiles in the cerebellum [1, 2]. The expression levels in oligodendrocytes, astrocytes, and Purkinje cells were higher in *Jdp2*-KO GCPs than they were in WT GCPs. In contrast, the expression of the markers in Golgi cells and GCs was lower in *Jdp2*-KO GCPs than it was in WT GCPs. **(B)** Western blot analysis of *Cacna1a* (p21<sup>Cip1</sup>), Calbindin, *Gabra1*, *Gabra6*, *Gabrb2*, *Grin2a* (Glutamate [N-methyl-D-aspartate: NMDA] receptor subunit epsilon-1), PCP-4 (Purkinje cell protein-4) and *Vglut1* (Vesicular glutamate transporter 1) proteins in *Gabra6*<sup>+</sup> PGCs cultivated with NAC for 7 days. The levels of expression of all markers were significantly higher in *Jdp2* KO vs. WT *Gabra6*<sup>+</sup> GCPs. The intensity of each band was then quantified. Uncropped raw data was shown in **Fig S5**. **(B)** Quantitative analysis of the results depicted in (A). The statistical analysis was performed as described in the Materials and Methods. The

expression of each protein in WT *Gabra6*<sup>+</sup> GCPs was taken as 1.0 (n = 3; \*P < 0.05; \*\*P < 0.01; \*\*\*P < 0.001).

**Fig. S2.** Comparative expression of marker genes in WT and *Jdp2* KO *Gabra6*<sup>+</sup>-PGCs that were cultured for 7 days with or without the addition of NAC. **(A)** Relative ARE-luciferase activities in WT and *Jdp2* KO *Gabra6*<sup>+</sup>-GCPs cultured for 7 days in the presence or absence of NAC. ARE-luciferase activities were measured as described in the Materials and Methods. The ratio of ARE luciferase and pGL3 luciferase in WT PGCs cultured with NAC after the introduction of 50 and 100 ng of pGL3 luciferase was set as 1.0 (n = 3; \*\*\*P < 0.001). **(B)** Expression of neural differentiation markers (GSK-3beta, NeuN, GABRA 6, and tubulin beta 3) in WT and *Jdp2* KO *Gabra6*<sup>+</sup>-GCPs that were cultured for 7 days with NAC. **(C)** Immunostaining was performed as described in the Materials and Methods. These data were obtained from the data in Panel (B). The relative expression of tubulin beta 3, GSK3beta, NeuN, and *Gabra6* in *Jdp2* KO GCPs was calculated in reference to that detected in WT *Gabra6*<sup>+</sup>-GCPs, which was set as 1.0 (n = 5, \*P < 0.05; \*\*P < 0.01; \*\*\*P < 0.001).

**Fig. S3.** Summary of the data of the cBioPortal for Cancer Genomics. A total of 8,139 patients and 8,597 samples from 26 studies were summarized in the cBioPortal for Cancer Genomics (assessed at Sept. 21, 2022) [16-17]. **(A)** The sample and patients with overlapping counts of the GABRA-related genes in the altered and unaltered group are listed. The mutations of *GABRA1*, *GABRA6*, *GABRB2*, and *CD44* exhibited a greater number of overlapped counts. **(B)** The gene alteration frequency, the number of samples altered, and the percentages of alterations in the profiles of *GABRA1*, *GABRA6*, *GABRA2*, *GABRB2*, *CD44*, *SLC7A11*, *CDKN1A*, *NHEIL2*, and *JDP2* are listed. **(C)** Presentation of the co-occurrence tendency ratio of GABRA-related brain tumors. GABRA-related gene

expression was strongly correlated with *SLC7A11*, *CDKN1A*, and *NFE2L2*. Further details are provided in the Materials and Methods.

**Fig. S4.** Mutation profiles of *GABRA1*, *GABRA6*, *GABRB2*, *CD44*, *SLC7A11*, *CDKN1A*, *NHE1L2*, and *JDP2*. **(A)** Mutations, gene amplifications, and deep deletion profiles of *GABRA1*, *GABRA6*, *GABRB2*, *CD44*, *SLC7A11*, *CDKN1A*, *NHE1L2*, and *JDP2* genes. **(B)** Presentation of the mutation maps of members of the GABRA family, xCT-channel-related proteins, and proteins involved in the antioxidation response for the induction of neural differentiation. The cBioPortal data were accessed, and we surveyed the mutation maps of GABRA, xCT channels, GSH, and antioxidation-response-related proteins. In total, 8,139 patients and 8,597 samples from 26 studies were summarized in the cBioPortal for Cancer Genomics (assessed at Sept. 21, 2022) [15-17].

**Fig. S5.** Uncropped raw data of the Western blots that were used in this article. **(A–D)** Results are provided according to the sequence mentioned in the main text. **(A)** Fig. 1F **(B)** Fig. 2D, **(C)** Fig. S1B, **(D)** Fig. 6D. The red rectangles represent regions that were cropped for use in the figures of this text and in the supplementary data.

### Supplementary Tables

STable 1; Antibodies used in this study

STable 2; Primers for qPCR used in this study

**A**

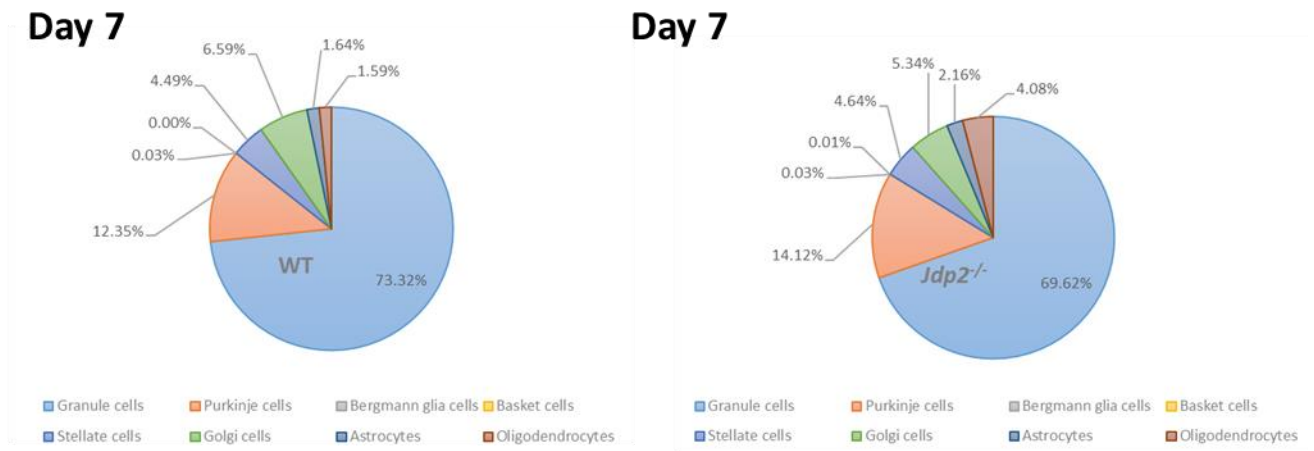

**B**

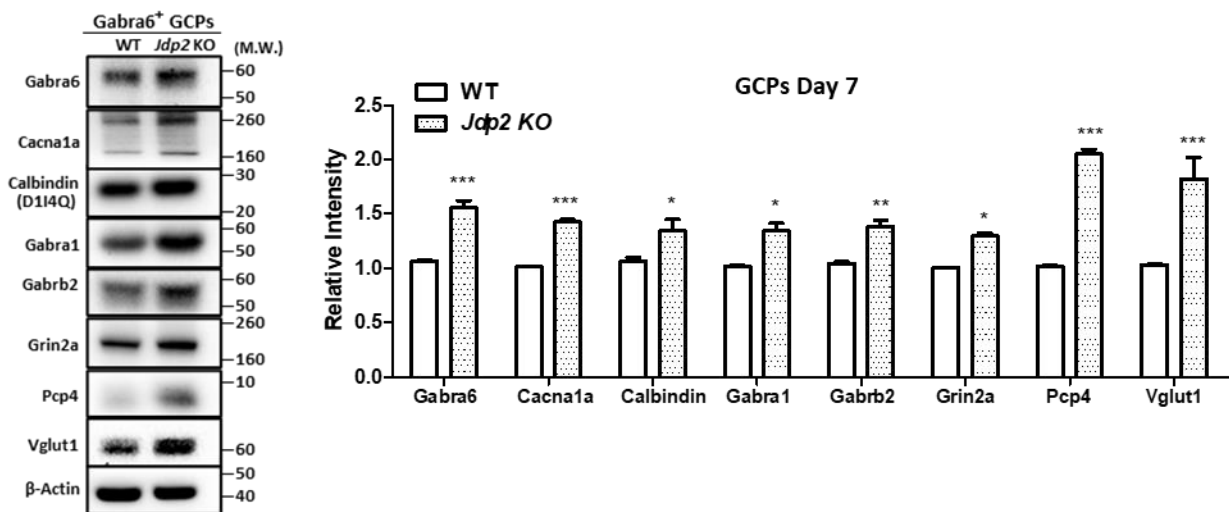

**A**

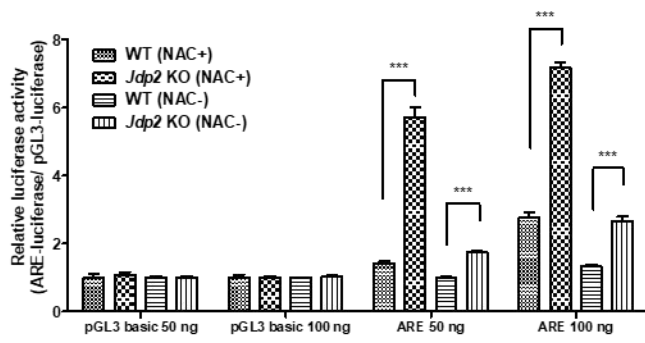

**B**

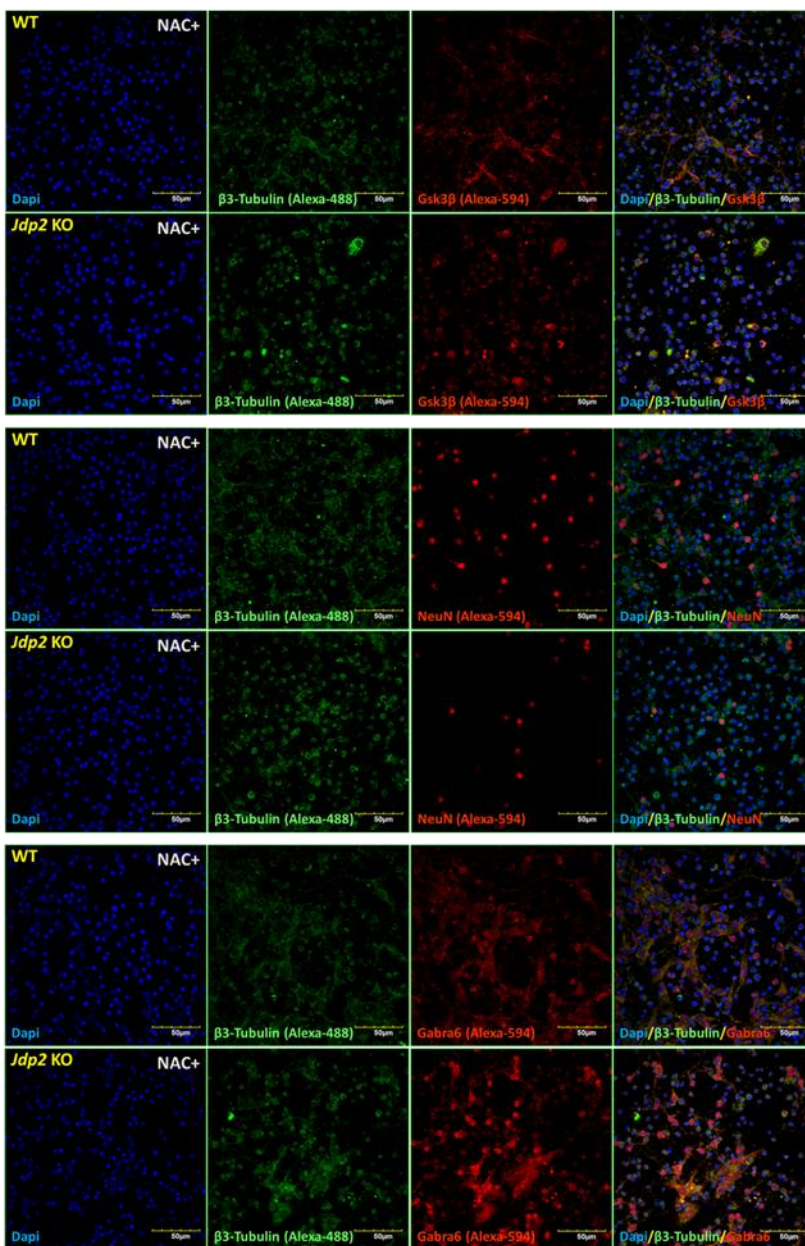

**C**

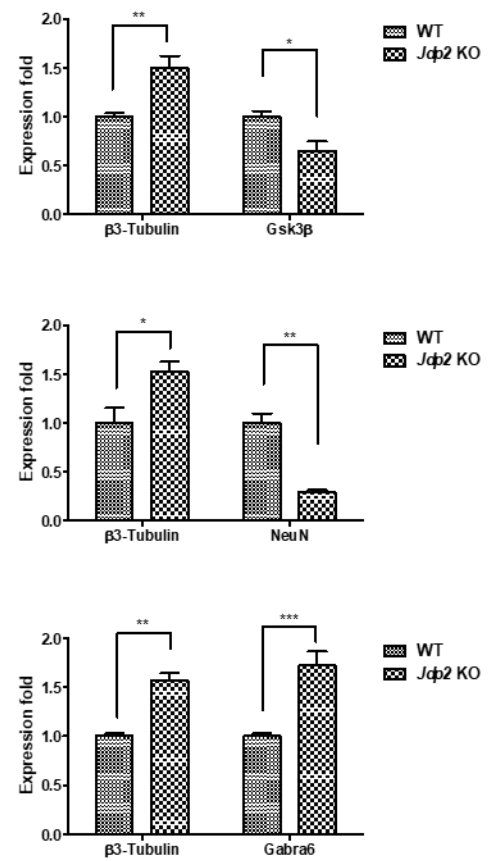

**A**

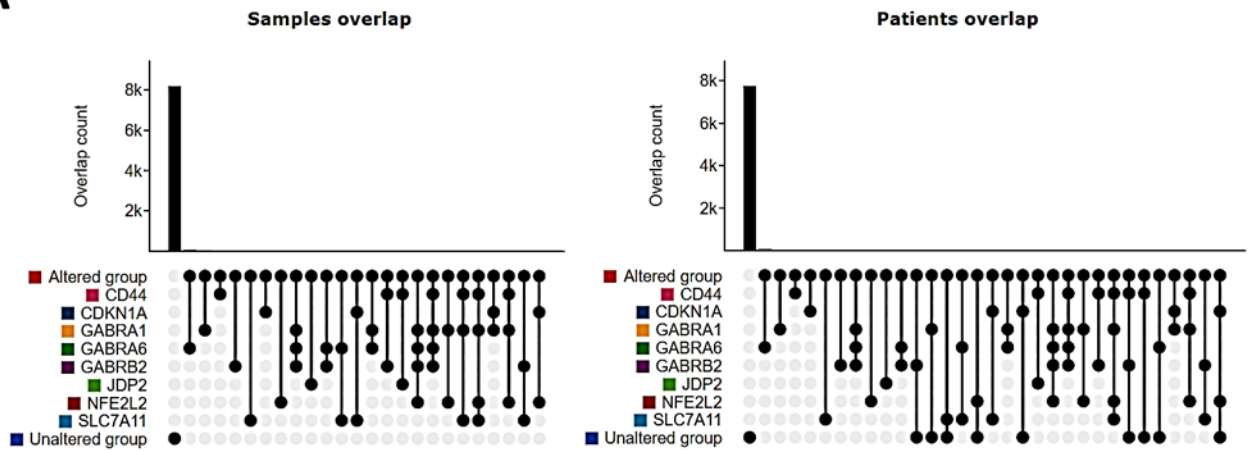

**B Gene Alteration Frequency**

| Gene Symbol | Num Samples Altered | Percent Samples Altered ▾ |
|-------------|---------------------|---------------------------|
| GABRA6      | 91                  | 1%                        |
| GABRA1      | 74                  | <1%                       |
| GABRB2      | 69                  | <1%                       |
| CD44        | 42                  | <1%                       |
| SLC7A11     | 40                  | <1%                       |
| CDKN1A      | 34                  | <1%                       |
| NFE2L2      | 28                  | <1%                       |
| JDP2        | 13                  | <1%                       |

Showing 1-8 of 8

**C**

| A       | B       | Neither | A Not B | B Not A | Both | Log2 Odds Ratio | p-Value | q-Value ▲ | Tendency      |
|---------|---------|---------|---------|---------|------|-----------------|---------|-----------|---------------|
| GABRA6  | GABRB2  | 3918    | 53      | 36      | 22   | >3              | <0.001  | <0.001    | Co-occurrence |
| GABRA1  | GABRA6  | 3907    | 47      | 59      | 16   | >3              | <0.001  | <0.001    | Co-occurrence |
| GABRA1  | GABRB2  | 3922    | 49      | 44      | 14   | >3              | <0.001  | <0.001    | Co-occurrence |
| SLC7A11 | CDKN1A  | 3976    | 32      | 18      | 3    | >3              | <0.001  | 0.004     | Co-occurrence |
| GABRA1  | NFE2L2  | 3957    | 60      | 9       | 3    | >3              | <0.001  | 0.004     | Co-occurrence |
| GABRA1  | CD44    | 3939    | 59      | 27      | 4    | >3              | 0.001   | 0.006     | Co-occurrence |
| CD44    | NFE2L2  | 3988    | 29      | 10      | 2    | >3              | 0.004   | 0.014     | Co-occurrence |
| GABRB2  | CD44    | 3943    | 55      | 28      | 3    | 2.941           | 0.010   | 0.033     | Co-occurrence |
| GABRA6  | SLC7A11 | 3922    | 72      | 32      | 3    | 2.352           | 0.026   | 0.082     | Co-occurrence |
| SLC7A11 | CD44    | 3965    | 33      | 29      | 2    | >3              | 0.029   | 0.082     | Co-occurrence |
| CD44    | JDP2    | 3994    | 30      | 4       | 1    | >3              | 0.038   | 0.096     | Co-occurrence |
| SLC7A11 | NFE2L2  | 3983    | 34      | 11      | 1    | >3              | 0.100   | 0.222     | Co-occurrence |
| GABRA1  | SLC7A11 | 3933    | 61      | 33      | 2    | 1.966           | 0.103   | 0.222     | Co-occurrence |
| NFE2L2  | CDKN1A  | 4976    | 20      | 27      | 1    | >3              | 0.111   | 0.222     | Co-occurrence |
| GABRA1  | CDKN1A  | 3946    | 62      | 20      | 1    | 1.670           | 0.282   | 0.527     | Co-occurrence |
| GABRB2  | SLC7A11 | 3937    | 57      | 34      | 1    | 1.023           | 0.399   | 0.699     | Co-occurrence |
| GABRA6  | CD44    | 3924    | 74      | 30      | 1    | 0.822           | 0.443   | 0.729     | Co-occurrence |



**A**

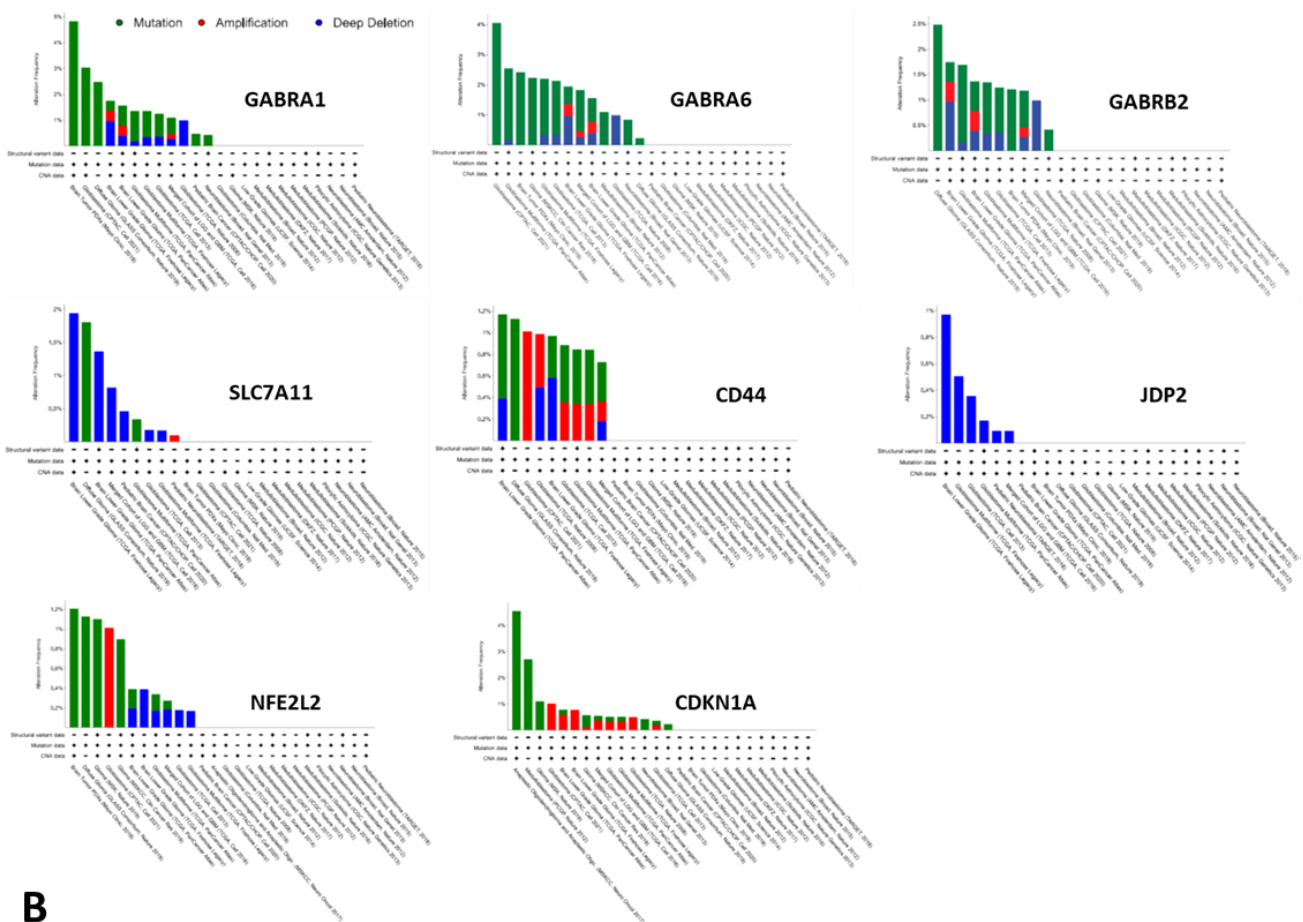

**B**

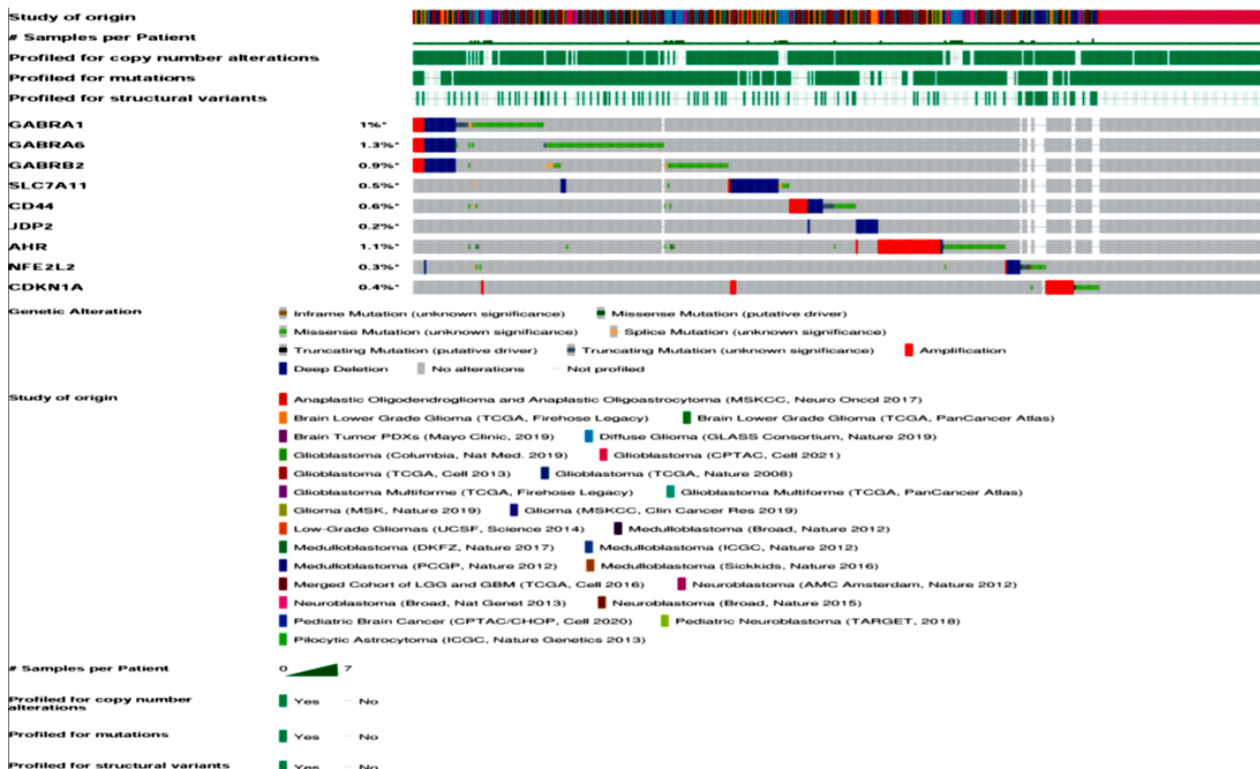

**A Fig. 1F**

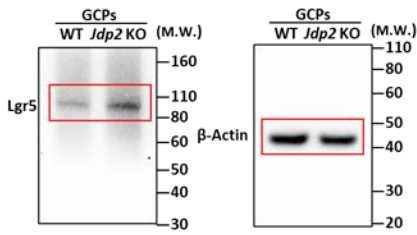

**B Fig. 2D**

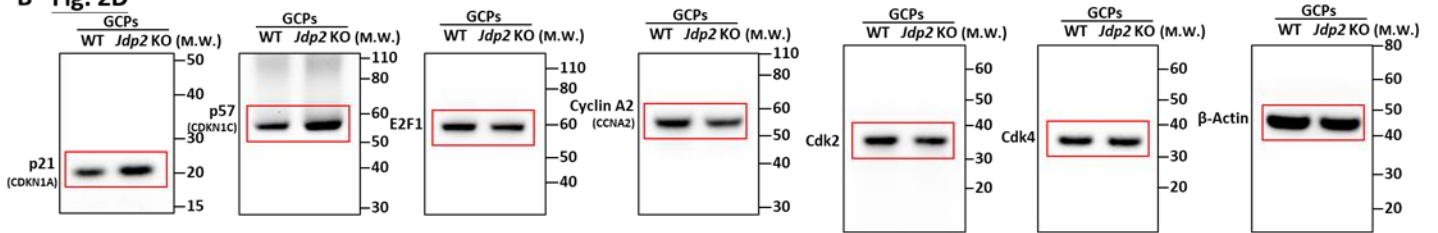

**C Fig. S1B**

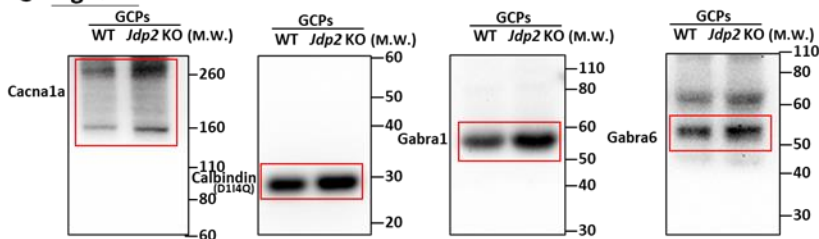

**C Fig. S1B**

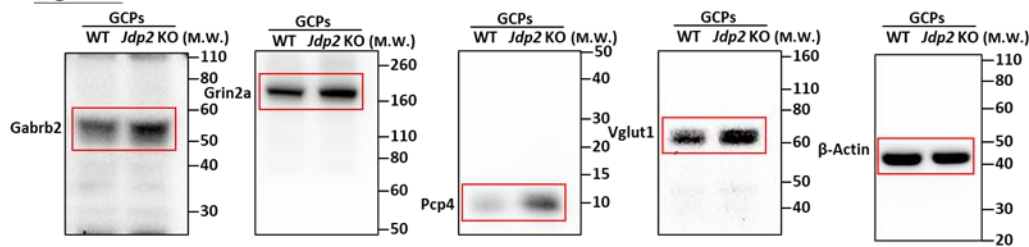

**D Fig. 6D**

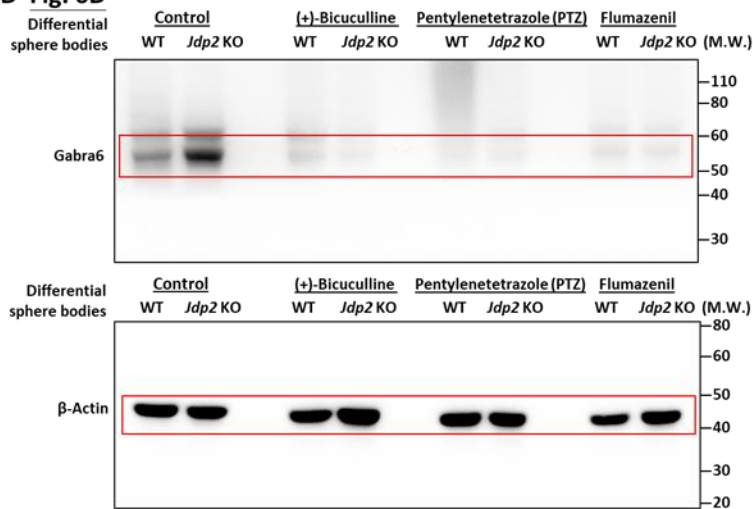

**STable 1 Antibodies used in this study**

| <b>Antibody name</b> | <b>Company</b>            | <b>Cat. no.</b> |
|----------------------|---------------------------|-----------------|
| Atoh1                | Merck Millipore           | AB5692          |
| p21 <sup>Cip1</sup>  | Santa Cruz Biotechnology  | sc-397          |
| AhR                  | Santa Cruz Biotechnology  | sc-8088         |
| Nrf2                 | Santa Cruz Biotechnology  | sc-722          |
| Nrf2                 | Cell Signaling Technology | CST #14596      |
| p57                  | Santa Cruz Biotechnology  | sc-56341        |
| Cdk2                 | Santa Cruz Biotechnology  | sc-70829        |
| Cdk4                 | Santa Cruz Biotechnology  | sc-260          |
| E2F1                 | Santa Cruz Biotechnology  | sc-193          |
| CyclinA2             | Santa Cruz Biotechnology  | sc-596          |
| Zic1                 | Merck Millipore           | AB5786          |
| Zic2                 | Merck Millipore           | AB15392         |
| Lgr5                 | Abcam                     | ab-75732        |
| Lgr5                 | Bioss Inc                 | bs-1117R        |
| Tubb3                | Cell Signaling Technology | CST#4466        |
| NeuN                 | Cell Signaling Technology | CST#24307       |
| Calbindin            | Cell Signaling Technology | CST #13176      |
| Cacna1a              | MyBioSource               | mbs176970       |
| Gabra1               | R&D Systems               | PPS022          |
| Gabrb2               | R&D Systems               | PPS031          |
| Gabra6               | Bioss Inc.                | bs-12063R       |
| Gabra6               | Bioss Inc                 | bs-12063R-FITC  |
| CD45                 | Bioss Inc.                | bs-10599R       |
| Gsk-3 $\beta$        | Cell Signaling Technology | CST #9315       |
| Neph3                | R&D Systems               | AF2930          |
| Neph3                | Novus Biologicals         | NBP2-68977      |
| Grin2a               | R&D Systems               | PPS012          |
| Gclm                 | Biorbyt Ltd.              | orb39793        |
| Pcp4                 | MyBioSource               | mbs2517367      |
| Vglut1               | Cell Signaling Technology | CST #12331      |
| GFAP                 | Merck Millipore           | 04-1062         |
| $\beta$ -actin       | Santa Cruz Biotechnology  | sc-47778        |
| Normal Rabbit IgG    | Cell Signaling Technology | CST#2729        |

|                                                        |                             |               |
|--------------------------------------------------------|-----------------------------|---------------|
| Anti-Rabbit-IgG HRP                                    | Cell Signaling Technology   | CST#7074      |
| Anti-Mouse-IgG HRP                                     | Cell Signaling Technology   | CST#7076      |
| Anti-Goat-IgG HRP                                      | Santa Cruz Biotechnology    | sc-2020       |
| Anti-mIgGk HRP                                         | Santa Cruz Biotechnology    | sc-516102     |
| Anti-Goat IgG HRP                                      | Jackson ImmunoResearch Inc. | # 705-035-157 |
| Anti-Rat-IgG HRP                                       | Jackson ImmunoResearch Inc. | # 112-035-167 |
| Alexa-Fluor® 488<br>conjugate Goat anti-<br>Mouse IgG  | Thermo Fisher Scientific    | A-11029       |
| Alexa Fluor® 488<br>conjugate Goat anti-<br>rabbit IgG | Thermo Fisher Scientific    | A-11034       |
| Alexa Fluor® 594<br>conjugate Goat anti-<br>mouse IgG  | Thermo Fisher Scientific    | A11032        |
| Alexa-Fluor® 594<br>conjugate Goat anti-<br>Rabbit IgG | Thermo Fisher Scientific    | A-11037       |
| Alexa Fluor® 647<br>Conjugate Goat anti-<br>rat IgG    | Cell Signaling Technology   | CST#4418      |

**Table 2 Primers for qPCR used in this study**

| <b>qPCR primers</b> | <b>Primer sequences (5'-3')</b> |                                  |
|---------------------|---------------------------------|----------------------------------|
| mOct4               | Sense                           | TCTTTCCACCAGGCCCCCGGCTC          |
|                     | Antisense                       | TGCGGGCGGACATGGGGAGATCC          |
| mKlf4               | Sense                           | GCGAACTCACACAGGCGAGAAACC         |
|                     | Antisense                       | TCGCTTCCTCTTCCTCCGACACA          |
| mSox2               | Sense                           | TAGAGCTAGACTCCGGGCGATGA          |
|                     | Antisense                       | TTGCCTTAAACAAGACCACGAAA          |
| mMyc                | Sense                           | TGACCTAACTCGAGGAGGAGCTGGAATC     |
|                     | Antisense                       | AAGTTTGAGGCAGTTAAAATTATGGCTGAAGC |
| mNanog              | Sense                           | TGGGTCTGCTACTGAGATGCTCTG         |
|                     | Antisense                       | CAACCACTGGTTTTTCTGCCACCG         |
| mGAPDH              | Sense                           | ACCACAGTCCATGCCATCAC             |
|                     | Antisense                       | TCCACCACCCTGTTGCTGTA             |
