# Supplementary material for: Trans-differentiation of Jdp2-depleted Gaba-receptor-positive cerebellar granule cells to Purkinje cells
Source: PubMed Central journal article supplement (PMC11655981; doi:10.1038/s41420-024-02262-2), 2024-12-18

### A Fig. 1F

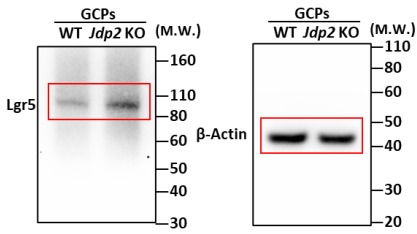

### B Fig. 2D

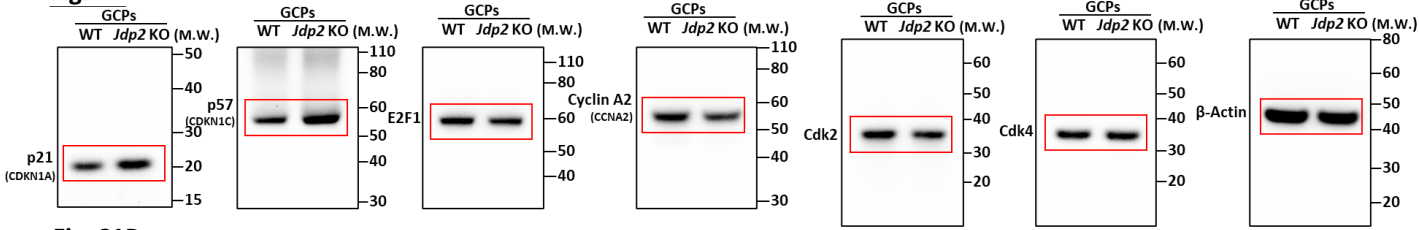

### C Fig. S1B

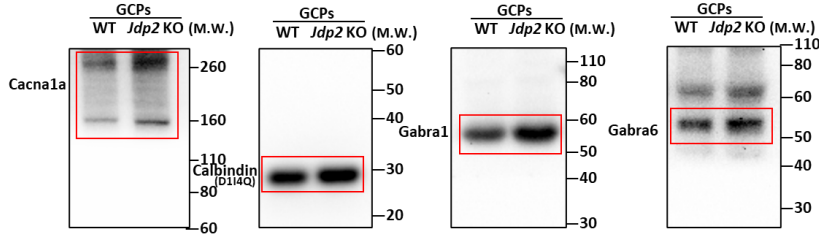

### C Fig. S1B

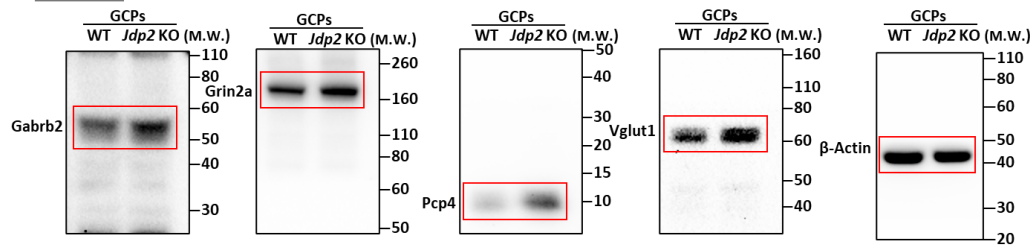

### D Fig. 6D

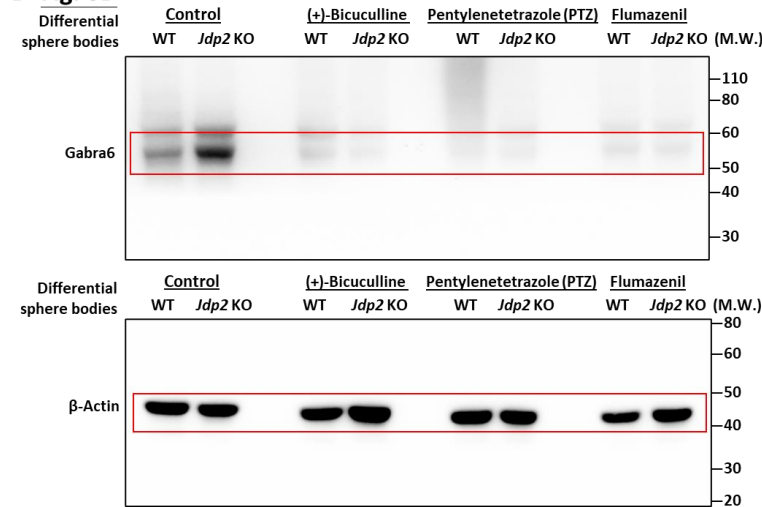

Supplement: 41420_2024_2262_MOESM2_ESM.pdf [file 41420_2024_2262_MOESM2_ESM.pdf]
